# Supplementary material for: Small Heterodimer Partner Modulates Macrophage Differentiation during Innate Immune Response through the Regulation of Peroxisome Proliferator Activated Receptor Gamma, Mitogen-Activated Protein Kinase, and Nuclear Factor Kappa B Pathways
Source: MDPI journal article supplement (doi:10.3390/biomedicines11092403), 2023-08-28
Supplement: s1 [file s1]

Table S1. **Primers for qPCR**

| Gene name                           | Sequence                                                                 |
|-------------------------------------|--------------------------------------------------------------------------|
| Mouse <i>Shp</i>                    | F: 5'-TGAGCTGGGTCCCAAGGA-3'<br>R: 5'-CCTGGCACATCTGGGTTGA-3'              |
| Mouse <i>Actin</i>                  | F: 5'- GGCTGTATTCCCCTCCATCG-3'<br>R: 5'- CCAGTTGGTAACAATGCCATGT-3'       |
| Mouse <i>TNF<math>\alpha</math></i> | F: 5'- CGTGGAACCTGGCAGAAGAG -3'<br>R: 5'- ACAAGCAGGAATGAGAAGAGG -3'      |
| Mouse <i>Ccl2</i>                   | F: 5'- TTA AAAACCTGGATCGGAACCAA -3'<br>R: 5'- GCATTAGCTTCAGATTTACGGGT-3' |
| Mouse <i>Nos2</i>                   | F: 5'- AATCTTGGAGCGAGTTGTGG -3'<br>R: 5'- CAGGAAGTAGGTGAGGGCTTG -3'      |
| Mouse <i>Arg1</i>                   | F: 5'- CTCCAAGCCAAAGTCCTTAGAG -3'<br>R: 5'- AGGAGCTGTCATTAGGGACATC -3'   |
| Mouse <i>CD163</i>                  | F: 5'- TGGGTGGGGAAAGCATAACT -3'<br>R: 5'- AAGTTGTCGTCACACACCGT -3'       |
| Mouse <i>CD206</i>                  | F: 5'- CTCTGTTTCAGCTATTGGACGC -3'<br>R: 5'- CGGAATTTCTGGGATTCAGCTTC -3'  |
| Mouse <i>CD11b</i>                  | F: 5'- ATGGACGCTGATGGCAATACC -3'<br>R: 5'- TCCCCATTACGTCTCCCA -3'        |
| Mouse <i>Ly6C</i>                   | F: 5'- GCAGTGCTACGAGTGCTATGG -3'<br>R: 5'- ACTGACGGGTCTTTAGTTTCCTT -3'   |
